# Supplementary figures and images for: Out of the oil bath and into the oven—microwave-assisted combinatorial chemistry heats up
Source: Royal Society of Chemistry journal article supplement (doi:10.1039/b301432k), 2003-03-26

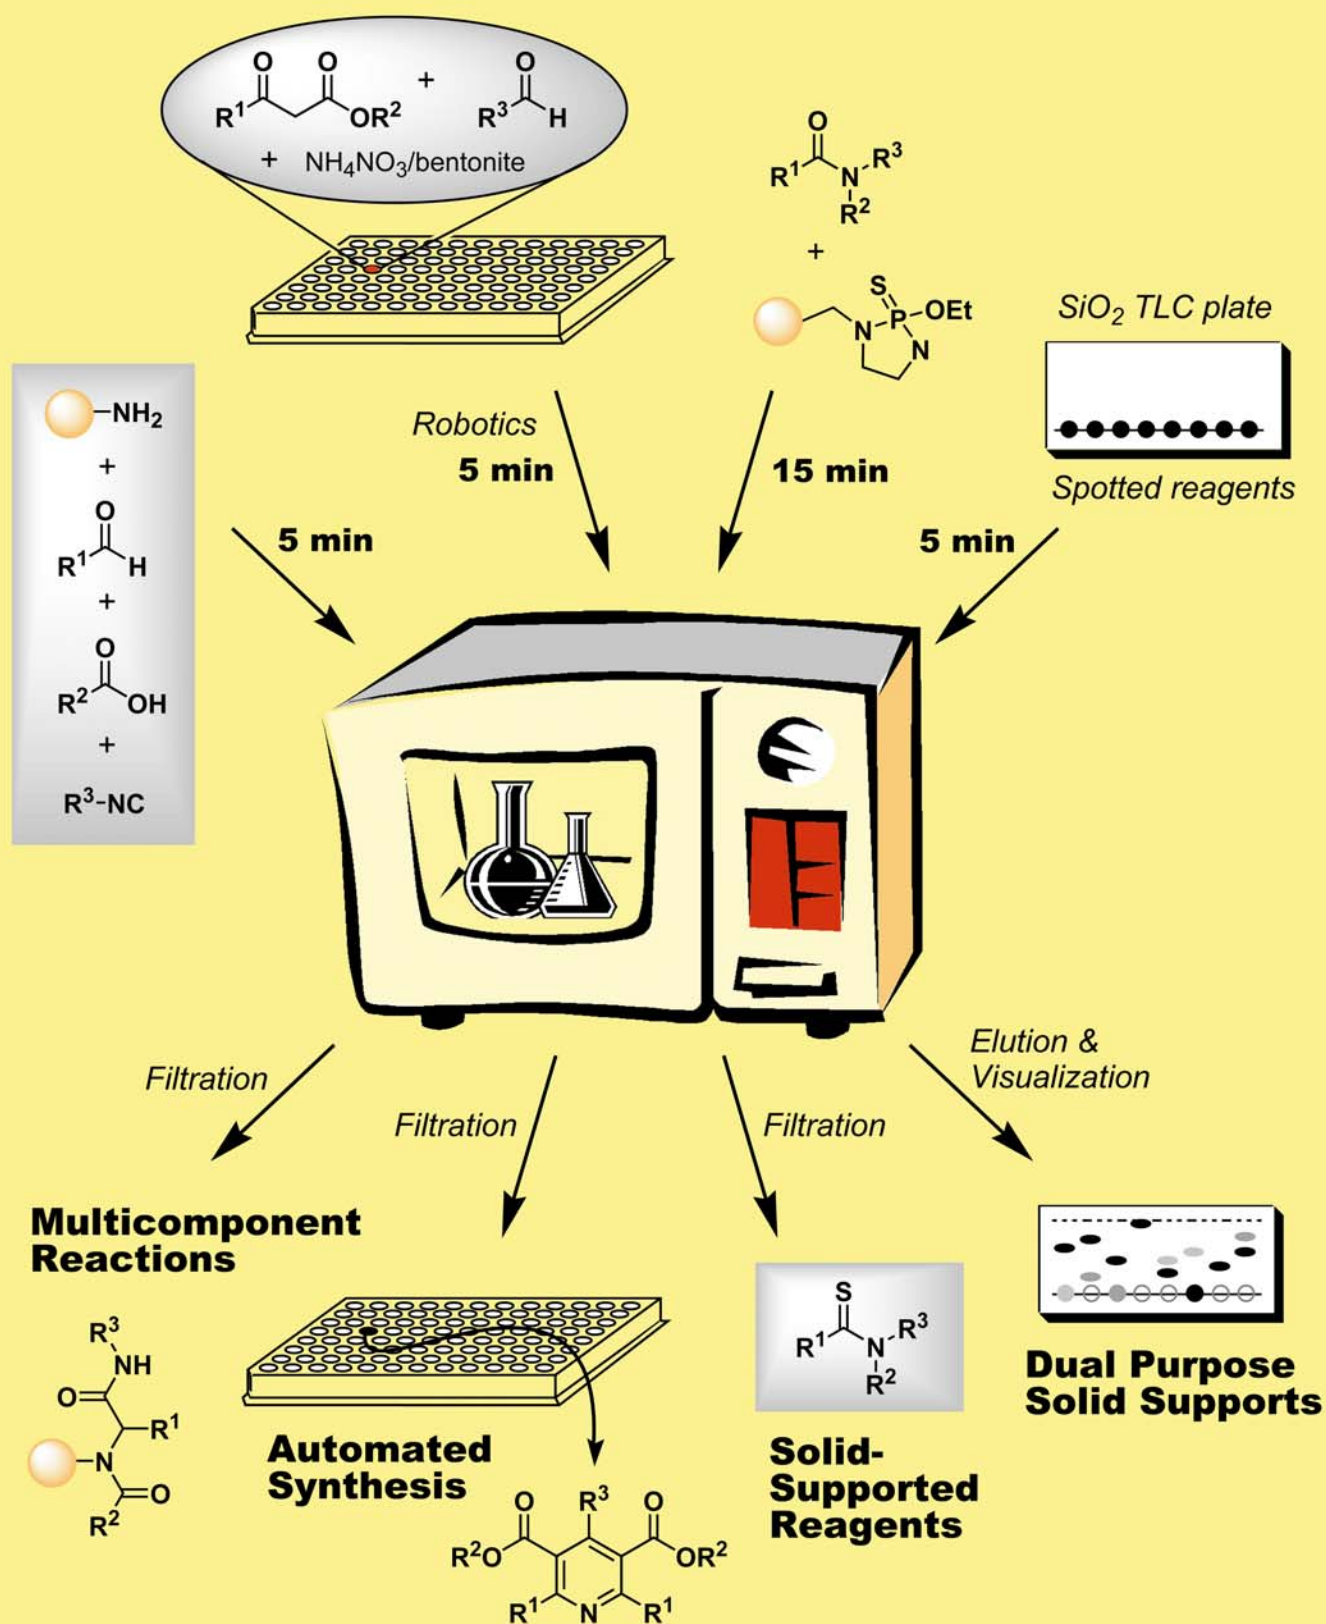

## Microwave-Assisted Combinatorial Chemistry: Accelerating Solid-Phase Discovery

Supplement: b301432k.pdf [file b301432k.pdf]
